# Supplementary material
Source: Springer Nature journal article supplement (https://www.springermedizin.de/resource/supplementary/12971_2013_153_MOESM2_ESM.pdf/9595086)

**a) I am familiar with current guidelines for treating tobacco use**

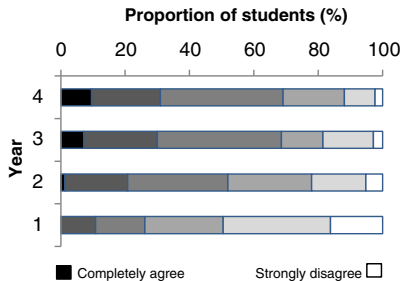

**b) I have received enough training on tobacco cessation interventions**

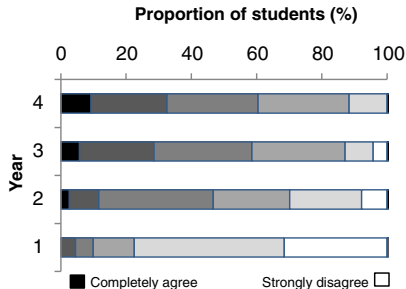

**c) I feel competent to counsel a smoker who is seeking help to give up smoking**

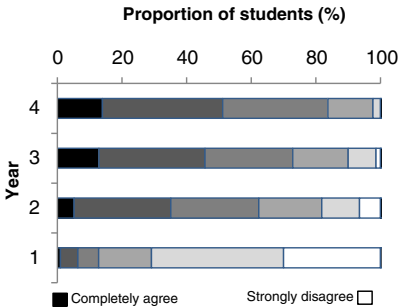

**d) I am comfortable providing medications to assist in tobacco cessation**

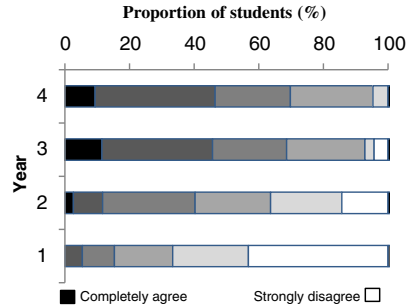

Supplement: MOESM2 [file 9595086]
